# Supplementary material for: A Systematic Review on Validated Precision Livestock Farming Technologies for Pig Production and Its Potential to Assess Animal Welfare
Source: Front Vet Sci. 2021 May 14;8:660565. doi: 10.3389/fvets.2021.660565 (PMC8160240; doi:10.3389/fvets.2021.660565)
Supplement: Supplementary file 1 [file Data_Sheet_1.xlsx]

## Sheet: Appendix table 1_ Commercial se
							PRODUCTION PHASE
	NAME	PROVIDER	INTERNET LINK	SENSOR TYPE	AIM	PROVIDER COUNTRY	Sows	Piglets and weaners	Fatteners
1	Agricultural Brain	Alibaba Cloud	https://www.alibabacloud.com/solutions/intelligence-brain/industrial	Camera	Locates and track each pig individually, monitoring movement, speed and behaviour. Optical weight meassurement	China			yes
2	Automatic Pig Sorter	Arlyn Scales	https://www.arlynscales.com/automated-pig-sorter/pig-farm-weighing-scales/	Load cells (Sorting scale / RFID)	Sorts by pig weight to enable targeted feeding and automatically sorts market hogs to cut sort loss and closely match packer’s matrixes.	USA	yes	yes	yes
3	Osdisat	Asserva	https://www.asserva.com/en/livestock/pigs-ordisat/	Load cells (Sorting scale)	Sends the animal to the right feeding space (dry or wet ) according to their weight (growers and finishers).	France			yes
4	Callmatic 2 ESF	Big Dutchman	https://www.interempresas.net/Farming/Companies-Products/Product-Feed-system-for-sows-Big-Dutchman-Callmatic-2-27599.html	Load cells (Feeder-individual / RFID)	Individual management and feeding of sows and gilts in group-housed settings without individual confinement.	Germany		yes	yes
5	Call-In ESF	Big Dutchman	https://www.interempresas.net/Farming/Companies-Products/Product-Computerized-feeding-station-Big-Dutchman-Call-Inn-106779.html	Load cells (Feeder-individual / RFID)	Individual management and feeding of sows and gilts in group-housed settings without individual confinement. Dry and liquid feeding	Germany	yes
6	TriSortpro	Big Dutchman	https://www.bigdutchman.es/es/manejo-de-cerdos/productos/detail/trisort-pro/	Load cells (Sorting scale)	Sorts by pig weight to enable targeted feeding and automatically sorts market hogs to cut sort loss and closely match packer’s matrixes.	Germany	yes
7	EasySlider	Big Dutchman	https://www.bigdutchman.com/en/pig-production/products/detail/easyslider/	Load cells (Feeder / drinker-individual)	Individual ad libitum sow feeding, adjusted to their needs. Early detection of inactive sows (feeding behaviour)	Germany		yes	yes
8	Norsonic I140 / 145 / 150	Campbell Ltd	https://www.campbell-associates.co.uk/category/sound-level-meters	Microphone	To measure animals and other sounds levels in livestock houses	England	yes	yes	yes
9	Ceres Tag	Ceres Tag	https://www.cerestag.com/benefits/	Accelerometer (ear)/ Contact temperature sensor	Monitoring activity, body temperature, positioning, feeding behaviour	Australia	yes	yes	yes
10	GAITFour®	CIR Systems, Inc.	https://www.gaitrite.com/	Load cells (Force plate)	To identify abnormal or asymmetric gates in lame pigs	USA	yes	yes	yes
11	Digitanimal GPS tracker	Digitanimal	https://digitanimal.com/?lang=en	GPS (collar)/Accelerometer (optional)/Body-temperature sensor (optional)	Positioning tracking. Optional activity and body temperature meassurements.	Spain	yes	yes	yes
12	idol-69-camera	Dol	https://www.dol-sensors.com/es/wp-content/uploads/sites/2/2019/03/Brochure-iDOL69-Camera_Digital.pdf	Camera	Weigher: Hand held individual weigher	Denmark	yes	yes	yes
13	Domino Pig Sort	Domino	https://www.domino.dk/en/products-for-porkers/sorting-systems-for-pigs	Load cells (Sorting scale)	Sorts pigs according to weight or percentage as requested (programmed). Displays weight distribution of animals per pen, house, farm and in total	Denmark			yes
14	EvoFeed	Erra	https://pdf.agriexpo.online/pdf/erra-tecni-ram-sl/evofeed/171589-25083.html	Load cells (Feeder-individual / RFID)	Individual feeding system for nourishing pregnant sows housed in groups.	Spain	yes
15	PCM (Pig Cough Monitor)	Fancom	https://www.fancom.com/	Microphone	Early cough detection (number, type), and pen from it comes	Netherlands		yes	yes
16	eYeScan	Fancom	https://www.fancom.com/project/eyescan-growth-monitor	Camera	Gowth monitor. Image based daily calculation of group body weight.	Netherlands	yes	yes	yes
17	eYenamic	Fancom	https://www.fancom.com/solutions/biometrics/eyenamic-behaviour-monitor-for-broilers	Camera	Group distribution and activity index to monitor behaviour	Netherlands	yes	yes	yes
18	eYeGrow	Fancom	https://www.fancom.com/solutions/biometrics/eyegrow-pig-weighing-systems	Camera	Grupal daily calculation of weight, size and growth	Netherlands			yes
19	IntelliTek ESF (Electronic sow feeding)	Fancom	https://www.fancom.com/solutions/automatic-feeding/intellitek-electronic-sow-feeding-station-esf	Load cells (Feeder-individual / RFID)	Individual feeding, fitted to gestating sows requirements (based in individual body condition)	Netherlands			yes
20	Farotek	Fancom	https://www.fancom.com/solutions/automatic-feeding/farotek-individual-sow-feeding-system	Load cells (Feeder-individual)	Individual sucking sow feeding, adjusted to their needs.	Netherlands	yes
21	Fancom Water Monitoring	Fancom	https://www.fancom.com/solutions/biometrics/water-monitoring-in-animal-housing	Flow meter	Group daily water consumption registration	Netherlands	yes
22	GroStat Growth Sensor	FarmVision	http://grostat.com/growth_sensor.php	Camera	Portable automatic calculation of indivudal weigh	USA	yes	yes	yes
23	FLIR AX8	Flir	https://www.flir.com/products/ax8-automation/	Thermal camera	Thermal imaging to detect inflammation, fever… Udder health or lamenesse	USA	yes	yes	yes
24	Flir T300 / FLIR 760 IR scanner / IRI 4010 / ThermaCam545 / ThermaCam P25 / FLIR Inframetrics 760	Flir	https://www.flir.es/	Thermal camera	Thermal imaging to detect inflammation, fever, lamenesse...	USA	yes	yes	yes
25	FLIR ThermoCAM S60	Flir	https://www.k-bid.com/auction/17034/item/1?offset=1	Thermal camera	Thermal imaging to detect inflammation, fever, lamenesse... Handheld	USA	yes	yes	yes
26	cPM-280 Thermacam	Flir	https://www.us-instrument.com/flir-inframetrics-pm280-infrared-imaging-system	Thermal camera	Thermal imaging to detect inflammation, fever, lamenesse... Handheld	USA	yes	yes	yes
27	FLIR (FLIR E5)	Flir	https://www.flir.es/products/e5-wifi/?gclid=Cj0KCQjw-r71BRDuARIsAB7i_QMMjODm2yS2Bq1CmSooRH8LIHc_nEXkSZFqiPeEeFTE4rB2jwtWk8AaAmC8EALw_wcB	Thermal camera	Handheld. Thermal imaging to detect inflammation, fever, lamenesse...	USA	yes	yes	yes
28	FLIR A 320	Flir	https://www.flir.com/products/flir-a320/	Thermal camera	Fixed. Thermal imaging to detect inflammation, fever, lamenesse...	USA	yes	yes	yes
29	IR FlexCam Pro	Fluke	https://www.fluke.com/en/product/thermal-cameras/ti45ft	Thermal camera	Thermal imaging to detect inflammation, fever… Udder health or lamenesse	USA	yes	yes	yes
30	Ti300	Fluke	https://www.fluke.com/es-mx/producto/camaras-termicas/ti300	Thermal camera	Thermal imaging to detect inflammation, fever… Udder health or lamenesse	USA	yes	yes	yes
31	Pig-Scale	H&F Electronics / MS Schippers	http://www.pigscale.com/	Load cells (Scale / RFID)	24/7 registers the pigs body weight. Registration of water consumption and temperature	Netherlands	yes	yes	yes
32	OptiSCAN	Hölscher + Leuschner GmbH	https://www.hl-agrar.de/hl+englisch/products/optiscan/index.html	Camera	Portable automatic calculation of indivudal weight	Germany		yes	yes
33	OptiFit	Hölschner + Leuschner	https://www.hl-agrar.de/cms/en/Pig/Agricultural-technology/optiFIT.html	Camera	Daily automatic monitoring of all the sows for automatic condition feeding	Germany		yes	yes
34	Hotraco Pig Weigher	Hotraco Agri	https://www.hotraco-agri.com/en/pig-solutions/animal-weighing	Load cells (Sorting scale)	Sorts by pig weight to enable targeted feeding and automatically sorts market hogs to cut sort loss and closely match packer’s matrixes.	Netherlands	yes	yes	yes
35	Tailtech	Innovent Technology	https://gtr.ukri.org/organisation/BC1BA4B1-BC18-4DF9-809F-4EEE44004863	Camera	Detect tail posture changes, to predict tail biting outbreaks.	USA		yes	yes
36	qscan	Innovent Technology	http://www.qscan.co.uk/	Camera	Grupal daily calculation of weight, size and growth	USA, Switzerland			yes
37	IVOG	Hokofarm Group	https://www.hokofarmgroup.com/	Load cells (Feeder-individual / RFID)	Monitoring individual feed intake of group-housed weanling pigs.	Netherlands			yes
38	Gestal Solo	Jyga Technologies	https://jygatech.com/farrowing/gestal-solo/	Load cells (Feeder-individual)	Individual ad libitum sow feeding, adjusted to their needs. Early detection of inactive sows (feeding behaviour)	Canada			yes
39	Kinect V1	Microsoft	https://www.microsoft.com/	Camera	Image-based body weight calculation	USA	yes	yes	yes
40	Nedap PorkSense	Nedap	https://www.nedap-livestockmanagement.com/es/porcino/soluciones/sorting/	Load cells (Sorting scale / RFID)	Sorts by pig weight to enable targeted feeding and automatically sorts market hogs to cut sort loss and closely match packer’s matrixes.	Netherlands		yes	yes
41	Nedap ProSense	Nedap	https://www.nedap-livestockmanagement.com/es/porcino/soluciones/performance/	Load cells (Feeder / scale-individual / RFID)	Information about individual weight and feed intake	Netherlands			yes
42	Nedap SowSense	Nedap	https://www.nedap-livestockmanagement.com/pigfarming/solutions/nedap-sowsense/	Load cells (Feeder / drinker / scale-individual / RFID)	Individual sow feeding, adjusted to their needs, in gestation and farrowing.	Netherlands		yes	yes
43	Nedap SowSense ESF	Nedap	https://www.nedap-livestockmanagement.com/pigfarming/solutions/nedap-sowsense/electronic-sow-feeding/	Load cells (Feeder / drinker-individual / RFID)	Individual sow feeding, adjusted to their needs, in gestation	Netherlands	yes
44	Nedap Sow sense weigh monitor	Nedap	https://www.nedap-livestockmanagement.com/pigfarming/solutions/nedap-sowsense/weight-monitoring/	Load cells (Scale)	Monitors sows weight	Netherlands	yes
45	Nedap Farrowing feeding	Nedap	https://www.nedap-livestockmanagement.com/pigfarming/solutions/nedap-sowsense/farrowing-breeding-stall-feeding/	Load cells (Feeder / drinker-individual / RFID)	Individual ad libitum sow feeding, adjusted to their needs. Early detection of inactive sows (feeding behaviour)	Netherlands	yes
46	Ethovision	Noldus	https://www.noldus.com/ethovision-xt	Camera	Video tracking and analyis of location, movement, changes in activity, freezing, automatic or manual score of behavioural events such as rearing or grooming	Netherlands	yes
47	HOBO MicroRX	Onset	https://www.agriexpo.online/prod/onset/product-186107-115519.html	Flow meter	Delivers water level and flow monitoring data to cloud-based HOBOlink® software.	USA	yes	yes	yes
48	Optris cs - pyrometer	Optris	https://www.optris.global/	Pyrometer	Contactless body temperature measurement	Germany	yes	yes	yes
49	TEAM ® Electronic Sow Feeding (ESF)	Osborne	https://osbornelivestockequipment.com/products/team-electronic-sow-feeding-esf-system/	Load cells (Feeder-individual / RFID)	Individual management and feeding of sows and gilts in group-housed settings without individual confinement.	USA	yes	yes	yes
50	Accu-TEAM ® Electronic Sow Feeding (ESF)	Osborne	https://osbornelivestockequipment.com/product/accu-team/	Load cells (Feeder / scale-individual / RFID)	Individual management and feeding of sows and gilts in group-housed settings without individual confinement. Individual body weight	USA	yes
51	FIRE ® Pig Performance Testing	Osborne	https://osbornelivestockequipment.com/products/fire-pig-performance-testing-system/	Load cells (Feeder-individual / RFID)	Permanent monitoring variations on feeding and drinking consumption, based on curves registration in the Fire software	USA	yes
52	Weight Watcher	Osborne	https://osbornelivestockequipment.com/product-category/shop-weight-watcher/	Load cells (Sorting scale / RFID)	Sorts by pig weight to enable targeted feeding and automatically sorts market hogs to cut sort loss and closely match packer’s matrixes.	USA			yes
53	Slow Feeder	Pellon	https://www.pellon.fi/en/pig_husbandry/feeding/slow_feeder/	Load cells (Feeder-individual)	Dispenses food slowly, keeping the sow’s attention on eating. Extends the feeding time, every pig gets the desired amount to eat, quietens the feeding process	Finland	yes
54	Weight-Detect	PLF-Agritech Europe	https://plfag.com/technology/	Camera	A module of OFIM (On-Farm Information Management system). Grupal daily calculation of weight, size and growth	Scotland, Australia			yes
55	Feed-Detect	PLF-Agritech Europe	https://plfag.com/technology/	Load cells	A module of OFIM (On-Farm Information Management system). To provide accurate measurements of feed weight delivered to individual animal pens. The data from each sensor is transmitted to a local data processing hub, and all the sensors of the house are carried out within a single processor.	Scotland, Australia			yes
56	RemoteInsights	Remote Insights	https://www.remoteinsights.net/	Accelerometer (ear)	Monitoring activity levels for health and heat information	USA			yes
57	Virtual Scale	Remote Insights	https://www.remoteinsights.net/solutions	Camera	Individual weighing	USA	yes	yes	yes
58	PigWatch SmaRt Tracking	Ro-Main	https://nosia-ls.es/wp-content/uploads/2019/04/Ro-Main_Pig_Tracking_ES.pdf	Camera	Locate and track each pig invicidually, know speed and position. Know ventilation, canibalism, health.	Canada			yes
59	PigWatch SmaRt Breeding	Ro-Main	https://www.ro-main.com/en/products/details_products.php?no_produit=54	Camera	Position monitoring, and specific behaviour patterns related to estrus detection, for optimal insemination moment	Canada			yes
60	ISS (Inteligent Surveillance System)	Ro-Main	https://www.ro-main.com/en/products/details_products.php?no_produit=19	Photoelectric sensor	Automatic on/off of heat lamps from the birth moment (birth detection mode incorporated). The heat lamp adjusts in function with the floor temperature and offers a micro-climate zone for the piglets without affecting the sow. Adjustable stall by stall. Less crushed piglets	Canada	yes	yes
61	Fidos	Roxell	http://www.roxell.com/en/systems/Pigs/Sows/fidos	Load cells (Feeder-individual / RFID)	Individual control and automatic registration of the feeding information per sow.The exact portion of the right feed type per sow.	Belgium	yes
62	MULTIfast	Roxell	http://www.roxell.com/en/systems/Weighing-Registration/Multifast/	Load cells	Accurate feed registration: fast overview of daily and/or total consumption per ingredient and/or per feeding place. Feed management according to feed curves. Complete management and control per compartment and/or per feeder. Applicable per feeder for restricted as well as for ad libitum feedin	Belgium	yes
63	IQON	Roxell	http://www.roxell.com/en/systems/Weighing-Registration/Iqon/	Load cells	Accurate feeding and drinking registration. Management of all pig house data.	Belgium	yes	yes	yes
64	Footscan® 3D Gait	RSscan International	https://rsscan.com/footscan/	Load cells (Force plate)	To identify abnormal or asymmetric gates in lame pigs	Belgium	yes	yes	yes
65	Piguard	Serket-tech	https://www.serket-tech.com/	Camera	The technology monitors health status by analyzing the behavioral patterns of the animals: physical activity, aggressiveness, feeding and drinking activity, social behavior	Netherlands	yes	yes	yes
66	ProGrow	SKOV A/S	https://www.skov.com/en/pig/Pages/ProGrow_november.aspx	Camera	Feed consumption and growth monitoring	Denmark		yes	yes
67	PigScale	Smart Agritech Solutions	https://www.smartagritech.se/products/pig-scale/?lang=en	Camera	Gowth monitor. Image based daily calculation of group body weight.	Sweden		yes	yes
68	RoiDOC	SmartAHC	https://www.smartahc.com/company/product	Contact temperature sensor	Monitoring core body temperature for health alerts	China			yes
69	RoiVISION	SmartAHC	https://www.smartahc.com/company/product	Camera	Locates and track each pig individually, monitoring movement, speed and behaviour. Optical weight meassurement	China	yes	yes	yes
70	RoiTAG	SmartAHC	https://www.smartahc.com/company/product	RFID (ear)	Electronic ID. Linked to RoiDOC and ROIvision systems.	China			yes
71	Smartbow	Smartbow GmbH	https://www.smartbow.com/en/how-it-works.aspx	Accelerometer (ear)	Monitoring activity	Austria			yes
72	RDM (Respiratory distress monitor)	Soundtalks	https://soundtalks.com/products/pig-respiratory-distress-package	Microphone	Early cough detection (number, type), and pen	Belgium	yes	yes	yes
73	SOMO	Soundtalks	https://soundtalks.com/products/somo	Microphone	Records and processes sound. Connection of 1 microphone, 2 temperature sensors, 1 relative humidity sensor	Belgium	yes	yes	yes
74	SOMO+	Soundtalks	https://soundtalks.com/products/somo-0	Microphone	Records and processes sound (4+ months of continuous audio recording). Connection of 1 microphone, 2 temperature sensors, 1 relative humidity sensor	Belgium	yes	yes	yes
75	SmartGuard	SWINETECH	https://swinetechnologies.com/product/smartguard/	Photoelectric sensor	Prevents piglets crushing, monitoring activity, behaviour and sound data, to locate piglets in distress. A wearable on sow's flank, alerts by means of vibration and electrical impulses, to stimulate sow to get up. Besides, alerts sow inactivity (disease or mortality)	USA	yes	yes	yes
76	Smart Light	Weda	https://www.weda.de/files/Smart_Light_ES.pdf	Load cells / Flow meter	Permanent monitoring variations on feeding and drinking consumption, based on curves registration in the Excellence 4PX software. Can be nstalled suckling sows, piglets and finishers in automatic feeders	Germany	yes	yes
77	SowComp	Weda	https://www.weda.de/en/electronic-sow-feeding	Load cells (Feeder-individual / RFID)	Individual feeding, fitted to gestating sows requirements. Ideal for group management. Up to 300 sows per 6 stations.	Germany	yes	yes	yes
78	SowComp Twin	Weda	https://www.weda.de/en/electronic-sow-feeding	Load cells (Feeder-individual / RFID)	Individual feeding, fitted to gestating sows requirements. Ideal for group management. Small farms with up to 50 sows.	Germany	yes
79	OptiMum	Weda	https://www.weda.de/en/dry-feeding	Load cells (Feeder-individual)	Individual sow feeding, adjusted to their needs.	Germany	yes
80	Smartis 336	Workswell	http://apliter.com/es/producto/camara-termografica-workswell-smartis-336-30hz-sin-lentes?search=workswell&gclid=Cj0KCQjwybD0BRDyARIsACyS8msjdmsG1LzwCBSkGDg0GSMevj7rfxQD3xjPJTr_9My_f9zwMjAPU84aAoZLEALw_wcB&order=price_asc	Thermal camera	Thermal imaging to detect inflammation, fever, lamenesse	Slovakia	yes	yes	yes
81	WirisPro	Workswell	http://apliter.com/es/producto/camara-termografica-workswell-wiris-2-gen-336x256-lente-17-19mm?search=workswell&gclid=Cj0KCQjwybD0BRDyARIsACyS8msjdmsG1LzwCBSkGDg0GSMevj7rfxQD3xjPJTr_9My_f9zwMjAPU84aAoZLEALw_wcB&order=price_asc	Thermal camera	Thermal imaging to detect inflammation, fever… health or lamenesse	Slovakia	yes	yes	yes
82	WUGGL One	WUGGL GmbH	http://www.wuggl.com/	Camera	Portable automatic calculation of indivudal weigh. Contactless body temperature meassurement	Austria	yes	yes	yes
83	PigWei	Ymaging	http://www.ymaging.com/projects-2/pigwei	Camera	Portable automatic calculation of indivudal weight	Spain	yes	yes	yes

## Sheet: Appendix table 2. Validation st
Study Number	Author	Year	Title	DOI	Objective	Type of sensor	Name of validated technology	Indicator	Golden standard used	Production phase	Sample size	Evaluation level	Evaluation of a sensor of a system	Validation level	Accuracy	Sensitivity	Specificity	Other results
1	Adrion, F	2018	Monitoring trough visits of growing-finishing pigs with UHF-RFID	10.1016/j.compag.2017.11.036	To validate a UHF-RFID system, consisting of a reader, antennas and passive transponder ear tags, for the monitoring of visits of growing-finishing pigs at a short trough for liquid feeding.	Load cells (Feeder / RFID)	Ear tag: Primaflex, Caisley International GmbH, Bocholt, Germany; anthenas: 1) Locfield® free-form antenna (Cavea Identification GmbH, Olching, Germany) and 2) (MT-242014/NRH/K, MTI Wireless Edge Ltd., Rosh-Ha'Ayin, Israel); multiplex reader: deister electronic GmbH, Barsinghausen, Germany and Agrident GmbH, Barsinghausen, Germany)	Feeding and drinking	Feeding time / Number of visits to the feeder	Fattener	25	Individual	A sensor	Internal	patch antennas at 25 dBm: 97.9%	patch antennas at 25 dBm: 49,7%. Free-form antenna at 26 dBm: 79,7%	patch antennas at 25 dBm: 99%	Correlation between video data and RFID visits: with patch antennas at 25 dBm: (R2=0.87 for total number, 0.80 for total duration of visits with a bout criterion of 30 s); with Free-form antenna at 26 dBm: (R2=0.78 for total number, 0.56 for total duration of visits with a bout criterion of 50 s)
2	Ahrendt, P.	2011	Development of a real-time computer vision system for tracking loose-housed pigs	10.1016/j.compag.2011.01.011	To present a real-time computer vision system for tracking of pigs in loose-housed stables, that will ease the workload for farmers in identification and locating individual animals	Camera	Elphel NC353L	Indentification and positioning	Positioning / Individual recognition / Animals’ boundaries detection	Fattener	3	Individual	A system (algorithm)	Internal	1			Could track for 8 mins
3	Alsahaf, A	2019	Estimation of Muscle Scores of Live Pigs Using a Kinect Camera	10.1109/ACCESS.2019.2910986	To propose a fast, inexpensive, and non-invasivemethod for estimating the muscularity of live pigs, using RGB-D computer vision and machine learning	Camera	Depht cameras Microsoft Kinect v1	Physical condition	Body seizes (muscle scores)	Fattener	3246	Individual	A sensor	Internal				0.65 Mean absolute error:
4	Amezcua, R.	2014	Infrared thermography to evaluate lameness in pregnant sows	10.7482/0003-9438-57-021	To evaluate Infrared thermography (IRT) as a method of detecting signs of inflammation in the lower limbs as an aid in lameness detection.	Thermal camera	(FLIR T300 camera, 2008; FLIR Systems, Boston, Massachusetts, USA	Physical condition	Body temperature as a physiological response (lameness detection)	Sows	297	Individual		Internal				P= 0.05 mean upper metatarsi IRT temperatura comparing sows greater than parity 2 with sows parity 0. P = 0.07 mean phalanges IRT temperatura comparing obese sows with normal or thin sows.
5	Besteiro, R.	2018	Agreement between passive infrared detector measurements and human observations of animal activity	10.1016/j.livsci.2018.06.008	To evaluate the agreement between two animal activity measurement methods: a PIR detector that uses the sensor's digital signal to perform measurements and human observations of activity in a group of weaned piglets on a commercial farm	Photoelectric sensor	OPTEX RX-40QZ	Activity	Motion detection as walking, feeding, resting	Weaners	50	Group		External				Spearman's correlation coefficient: 0.90 (p < 0.001) and a concordance correlation coefficient: 0.86.
6	Besteiro, R.	2018	Estimation of patterns in weaned piglets’ activity using spectral analysis	10.1016/j.biosystemseng.2017.06.014	To characterise the daily activity pattern of piglets based on data obtained by a passive infrared detector on a conventional farm	Photoelectric sensor	OPTEX © RX-40QZ	Activity	Motion detection (activity or inactivity periods)	Weaners	50	Group		Internal
7	Bowman, A.S. S.	2016	The Inability to Screen Exhibition Swine for Influenza A Virus Using Body Temperature	10.1111/zph.12201	To test the use of swine body temperature measurement, recorded by infrared and rectal thermometers, as a practical method to detect Influenza A Virus-infected swine at agricultural fairs	Infrared thermometer	Infrared thermometer: IRFS; ThermoWorks, Lindon, UT, USA. Digital thermometer: CVS Digital Flexible Tip Thermometer; CVS Health Woonsocket, RI, USA	Physical condition	Body temperature as a physiological response (fever)	Pigs in general	1092	Individual	A sensor	Internal				SEM = 0,18 IAV positive pigs and 0,10 IAV negative pigs (IR thermometer). SEM = 0,08 IAV positive pigs and 0,01 IAV negative pigs (rectal temperature) (standard error of the mean).
8	Bruininx, E	2001	The IVOG feeding station: a tool for monitoring the individual feed intake of group-housed weanling pigs	10.1046/j.1439-0396.2001.00305.x	To validate the use of an IVOG feeding station as a tool for monitoring individual feed intake of group-housed weanling pigs.	Load cells (Feeder / RFID)	IVOG® feeding stations (Insentec B.V., Marknesse, The Netherlands)	Feeding and drinking	Feed intake	Weaners	310	Individual		Internal				1.1% overestimation of the feed intake
9	Buayai, P	2019	Semi-automatic pig weight estimation using digital image analysis	10.13031/aea.13084	To design and develop a machine vision-based pig weighing system that is practical and applicable in an actual farm environment without changing the structure of the farm	Camera	Simple pinhole camera models (CCTV) and vido recording software: BORIS software 2016	Physical condition	Body-weight	Fattener	40	Group		Internal				Mean Absolute Percentage Error (MAPE): 3,84% and R2 0.66: smaller error than multiple linear regression (MAPE of 2.84% with R2 0.84). Absolute mean error 2.84%; prediction time 7.18 milliseconds
10	Cang, Y.	2019	An Intelligent Pig Weights Estimate Method Based on Deep Learning in Sow Stall Environments	10.1109/ACCESS.2019.2953099	To propose an approach based on deep neural network to estimate the live weights of pigs in saw stalls, to further the application of artificial intelligence techniques in agriculture	Camera	N.S.	Physical condition	Body-weight	Sows	20	Individual	A system (algorithm)	Internal				Absolute error less than 0.8 kg, relative error less than 0.5%. Average absolute error: 0.644 kg, and average relative error: 0.374%.
11	Chedad, A.	2001	Recognition system for pig cough based on probabilistic neural networks	10.1006/jaer.2001.0719	To present a new approach to distinguish cough sounds from other sounds, such as grunts, metal clanging and background noise, using neural networks as the classification method.	Microphone	Microphone Model 16 A, SHURE	Health	Cough detection	Fattener	4	Individual	A system (algorithm)	Internal	91,9% correct classification of coughs. 91,4% discrimination performance of grunts, 63,9% metal clanging and background noise 82,6%			0.919
12	Chen, C	2019	Detection of aggressive behaviours in pigs using a RealSence depth sensor	10.1016/j.compag.2019.105003	To develop a depth image analysis method to automatically detect aggressive behaviours of group-housed pigs	Camera	Intel® RealSense ™ Depth Camera D435	Behavior	Agressive behavior	Fattener	16	Group		Internal	97.5%	98.2%	96.7%	Precision: 96.8%
13	Chen, C.	2020	Classification of drinking and drinker-playing in pigs by a video-based deep learning method	10.1016/j.biosystemseng.2020.05.010	To investigate a deep learning method based on convolutional neural network (CNN) and long short-term memory (LSTM) to classify drinking and drinker-playing	Camera	RGB IR outdoor dome security camera (CTP-TLVA29AV, Cantek Plus, USA), and MATLAB (R2018b, The MathWorks Inc.,MA. Softwre	Feeding and drinking	Drinking duration / Number of visits to the drinker / Drinkers-playing behavior	Weaners	N.S.	Group		Internal	87.2% and 92.5% classification accuracy in the body and head regions
14	Chen, C.	2017	Image motion feature extraction for recognition of aggressive behaviors among group-housed pigs	10.1016/j.compag.2017.09.013	To develop a computer vision-based method to automatically detect aggressive behaviors among pigs.	Camera	Canadian point grey industrial camera FL3-U3-88S2C-C	Behavior	Agressive behavior	Weaners	70	Group	A system (algorithm)	Internal	95.82% (med aggression), 97.04 (high aggression)	90.57% (med aggression), 92.54% (high aggression)	96.95% (med aggression), 97.38% (high aggression)
15	Chung, Y.	2014	A cost-effective pigsty monitoring system based on a video sensor	10.3837/tiis.2014.04.018	To propose an automated solution for measuring the daily-life activities of pigs by using video data in order to manage the group-housed pigs, especially focused on the circadian rhythm of group-housed pigs under windowless and 24-hour light-on conditions.	Camera	N.S.	Activity	Motion detection (activity or inactivity periods)	Weaners	46	Group	A system (algorithm)	Internal	0.99
16	Condotta, I	2018	Evaluation of a depth sensor for mass estimation of growing and finishing pigs	10.1016/j.biosystemseng.2018.03.002	To validate the use of depth images in predicting live animal mass	Camera	Depth sensor Microsoft Kinect® (Version 1), software MATLAB, version R2015b	Physical condition	Body-weight (mass)	Gilts, fatteners	234	Individual		Internal				R2 0.9905: from global equation to predict mass. There was no significant difference between the global equation and the individual equations for barrows and gilts (p < 0.05)
17	Conte, S.	2014	Measure and characterization of lameness in gestating sows using force plate, kinematic, and accelerometer methods	10.2527/jas.2014-7865	To assess sows’ lameness by measuring weight distribution on limbs using a force plate made up of 4 individual platforms each resting on 4 single-ended beam load cells	Load cells (Force plate)	Force plate: N.S. ; kinematics: camera DFK22AUC0 camera, Imagine Source Europe, GmbH, Germany, and MOVIAS Pro, NAC Image technologie, Simi Valley, CA, motion analysis software; accelerometer: HOBO Pendant G Datalogger, Onset Computer Corporation, Pocasset, MA.	Health	Weight distribution on legs	Sows	71	Individual	A sensor	Internal				p < 0,05
18	Cook, N.J. J.	2018	The automated analysis of clustering behaviour of piglets from thermal images in response to immune challenge by vaccination	10.1017/S1751731117001239	To use an automated method of estimating the spatial distribution of piglets within a pen was used to assess huddling behaviour undernormal conditions and during a febrile response to vaccination. The automated method was compared with a manual assessmentof clustering activity.	Thermal camera	IR camera (FLIR A320; FLIR Vision Systems, ITMInstruments Inc. Calgary, Alberta, Canada	Physical condition	Animals’ space distribution associated to body-temperature or group radiated-temperature	Piglets	168	Group		Internal				P<0.0001 (Clustering score and blob score). r=−0.58,−0.6 and 0.6 (relationship between temperature response variable and the cluster, blob and crude count response variables, respectively)
19	Cordeiro, A.F.D.S.	2012	Efficiency of distinct data mining algorithms for classifying stress level in piglets from their vocalization	10.1590/S0100-69162012000200001	To identify stress in piglets using vocalization, calling this stress on three levels: no stress, moderate stress, and acute stress, evaluating the efficiency of distinct data mining algorithms	Microphone	Yoga EM 9600®directional microphone (a) and a Marantz® PMD 660 digital sound recorder	Behavior	Stress vocalizations	Piglets	20	Individual	A system (algorithm)	Internal	76.78%: the highest one, obtained by k-NN algorithm; 75% by Nnaive Bayes algorithm; 75% by J48 algorithm;
20	Cordeiro, A.F.D.S.	2018	Use of vocalisation to identify sex, age, and distress in pig production	10.1016/j.biosystemseng.2018.03.007	To investigate the differences in pig vocalisation as a function of the sex, age, and distress conditions, and to propose a way of identifying distressful situations	Microphone	N.S.	Behavior	Stress vocalizations	Pigs in general	40	Individual	A system (algorithm)	Internal	81.92%
21	Cornou, C	2011	Modelling and monitoring sows' activity types in farrowing house using acceleration data	10.1016/j.compag.2011.02.010	To suggest an acceleration data-based method for classifying sows' activity types performed in farrowing house	Accelerometer	IS3L02DS, STMicroelectronics	Activity	Motion detection as walking, feeding, resting / Postural states	Sows	24	Individual	A system (algorithm)	Internal	75%-100% for activity types; 96%-100% for activity categories.
22	Cross, A.J.	2018	Feed-forward and generalised regression neural networks in modelling feeding behaviour of pigs in the grow-finish phase	10.1016/j.biosystemseng.2018.02.005	To compare the use of feed-forward (FFNN) and generalised regression neural networks (GRNN) in forecasting feeding behaviour of pigs in the grow-finish phase, using time of day and temperature humidity index as inputs.	Load cells (Feeder / RFID)	Matlab Neural Network Toolbox (MATLAB Release 2016a, The MathWorks, Inc., Natick); Electronic feeder: N.S	Feeding and drinking	Feeding time / Number of visits to the feeder	Fattener	1923	Group	A system (algorithm)	Internal				r= 0,623 - 0,754 between predicted and observed feeding behaviours
23	da Fonseca, F.N.	2020	Automatic prediction of stress in piglets (Sus Scrofa) using infrared skin temperature	10.1016/j.compag.2019.105148	To develop a model to predict stress in piglets based on the infrared skin temperature (IST) using machine learning and the paraconsistent logic.	Thermal camera	IR camera Testo 876-1, Testo Instruments, Lenzkirch, Germany	Physical condition	Body temperature associated to stressful situations (pain, manipulation)	Piglets, weaners	72	Individual	A system (algorithm)	Internal	100% (cold), 91% (thirst), 86% (hunger), 50% (pain)
24	da Silva Cordeiro, A.F.	2013	Understanding vocalization might help to assess stressful conditions in piglets	10.3390/ani3030923	To identify stress conditions in piglets reared in farrowing pens through their vocalization, and evaluate the J48 decision tree algorithm available at the Weka® data mining software for stress classification	Microphone	Yoga® unidirectional microphone, Marantz® PMD 660 digital recorder, Praat® sound analysis software	Behavior	Stress vocalizations	Piglets	40	Individual	A sensor	Internal	81.12%
25	da Silva, J.P.	2019	Classification of piglet (Sus Scrofa) stress conditions using vocalization pattern and applying paraconsistent logic Eτ	10.1016/j.compag.2019.105020	To develop a software that predicts stress in the piglet using the vocal calls emitted during stressful conditions (cold/heat, pain, hunger, thirst).	Microphone	Digital recorder (audio field recorder Marantz® PMD 660, USA); Praat® software	Behavior	Stress vocalizations	Piglets, weaners	40	Group	A system (algorithm)	Internal	98% pain identification, 69% trageting hunger, 71% cold/heat
26	D'Eath, R	2018	Automatic early warning of tail biting in pigs: 3D cameras can detect lowered tail posture before an outbreak	10.1371/journal.pone.0194524	To automate the measurement of pig tail posture by means of image analysis, for early warning of tail biting outbreaks	Camera	IFM O3D301 cameras, and Tailtech system, Insentec B.V.	Behavior	Tail posture	Fattener	667	Group		Internal	73.9%	88.4%	66.8%
27	Escalante, H	2013	Sow-activity classification from acceleration patterns: A machine learning approach	10.1016/j.compag.2013.01.003	To describe a supervised learning approach to sow-activity classification from accelerometer measurements.	Accelerometer	LIS3L02DS from STMi-croelectronics	Activity	Motion detection as walking, feeding, resting / Postural states	Sows	11	Individual	A system (algorithm)	Internal	80% Recognition rate			AUC= 0,8105 average for all activities
28	Exadaktylos, V.	2009	Time-series analysis for online recognition and localization of sick pig (Sus scrofa) cough sounds	10.1121/1.2998780	To presentan automated online recognition and localization procedure for sick pig cough sounds.	Microphone	electret microphones Microphones (Monacor ECM 3005), Tascam Digital Interface (TDIF) unit (Soundscape SS8IO-3).	Health	Cough detection	Fattener	6	Individual	A system (algorithm)	Internal	73-93% correct identification ratio range
29	Faltys, G.L.	2014	Technical note: Validation of electronic feeding stations as a swine research tool	10.2527/jas.2013-6808	To determine if data recorded by 2 FIRE stations (FIRE1 and FIRE2) were different from the same data recorded by calibrated scales and determine differences between the 2 independent FIRE stations.	Load cells (Feeder / RFID)	FIRE ® Pig Performance Testing, Osborne Industries, Inc., Osborne, KS	Feeding and drinking / Physical condition	Feed intake / Body weight	Fattener	30	Individual		External				99.5% confidence interval of feed weights, percentage error of 3% for body weights
30	Farrar, K.L.	2020	Comparison of Rectal and Infrared Thermometry Temperatures in Anesthetized Swine (Sus scrofa)	10.30802/AALAS-JAALAS-19-000119	To compare rectal temperature and IRTM in healthy anesthetized swine, with the hypothesis that IRTM would be an accurate, noninvasive alternative for rectal temperature measurement.	Thermal camera	FLIR E5	Physical condition	Body temperature	Gilts	26	Individual		External				r= 0.359 Rectal temperature and eye IRT. r= 0.432 Rectal temperature and neck IRT
31	Feng, Y.-Z.	2019	Establishment of validated models for non-invasive prediction of rectal temperature of sows using infrared thermography and chemometrics	10.1007/s00484-019-01758-2	To investigate surface temperature measurement by Infrared thermography, to explore its feasibility in non-invasive detection of rectal temperature in sows.	Thermal camera	IR thermal camera T530, FLIR Systems, Inc., Wilsonville, OR, USA	Physical condition	Body temperature	Sows	99	Individual	A system (algorithm)	Internal				r= 0,80 and root mean squared error of calibration in optimal model. r= 0,80 and root mean squared error for prediction= 0.35 °C
32	Fernandes, A.F.A.	2019	A novel automated system to acquire biometric and morphological measurements and predict body weight of pigs via 3D computer vision	10.1093/jas/sky418	To devise and evaluate an automated computer vision system for extraction of features of interest, as body measurements and shape descriptors, and prediction of body weight in pigs	Camera	Kinect V2 sensor (Microsoft, Redmond, WA)	Physical condition	Body-weight	Weaners, fatteners	655	Individual		Internal				R2: 0.86 - 0,94 Models developed with data from nursery and finishing pigs; R2: 0.70 - 0,84 models developed without nursery pigs
33	Fernández-Carrión, E	2017	Motion-based video monitoring for early detection of livestock diseases: The case of African swine fever	10.1371/journal.pone.0183793	To evaluate significant changes in animals’ motion after being experimentally infected with African Swine Fever virus, by means of an image-based system that classifies and quantifies motion-based animal behaviour and daily activity in video sequences, allowing automated and non-intrusive surveillance in real-time.	Camera	N.S.	Activity	Motion detection (activity or inactivity periods)	Fattener	N.S.	Individual		Internal	>95%
34	Gertheiss, J.	2015	Marginal Functional Regression Models for Analyzing the Feeding Behavior of Pigs	10.1007/s13253-015-0212-7	To use high frequency radio frequency identification for data analysis to find pig-specific feeding profiles showing the typical feeding pattern of each pig	Load cells (Feeder / RFID)	N.S.	Feeding and drinking	Feeding time / Number of visits to the feeder	Fattener	127	Individual		Internal				95 % confidence intervals
35	Grégoire, J.	2013	Assessment of lameness in sows using gait, footprints, postural behaviour and foot lesion analysis	10.1017/S1751731113000098	To develop methods to evaluate and quantify lameness in breeding sows, and to compare five methods to study lameness between themselves and with visual gait scoring used as a reference: footprint analysis, kinematics, accelerometers, lying-to-standing transition and foot lesion observation.	Accelerometer / Camera	Leg Accelerometer (Pendant G AccelerationData Logger, Onset Computer Corporation, Pocasset, MA, USA); cameras: uEye UI-1225LE-C,Imaging Development Systems GmbH, Obersulm, Germany) and tracking program (Movias Pro, version 1.63g: 3D, NACImage Technology, Simi Valley, CA, USA)	Activity	Postural state, postural transitions	Sows	50	Individual	A sensor	Internal				r= 0,64-0,66. Variability between sows with the 4 methods: 40,9% - 43,8%
36	Guarino, M.	2008	Field test of algorithm for automatic cough detection in pig houses	10.1016/j.compag.2007.08.016	To test an algorithm in field conditions, whose was previously developed and tested under laboratory conditions, to detect cough sounds and to classify the animals whether they were ill or not. In this study	Microphone	Microphone	Health	Cough detection	Fattener	44	Group	A system (algorithm)	Internal	86,2% detection of different cough events in field condtions			85.5% correct classification of cough sounds and 86.6% correct classification of the other sounds
37	Jiao, S.	2016	The use of multiple imputation for the accurate measurements of individual feed intake by electronic feeders	10.2527/jas.2015-9667	To examine the use of a novel data-editing strategy involving multiple imputation to minimize the impact of errors and missing values on the quality of feed intake data collected by an electronic feeding system	Load cells (Feeder / RFID)	FIRE ® Pig Performance Testing, Osborne Industries, Inc., Osborne, KS	Feeding and drinking	Feed intake	Fattener	14901	N.S.	A system (algorithm)	Internal				96.7, 93.5, and 90.2% mean accuracies with multiple imputation (MI), 96.8, 94.4, and 90.1% with multiple imputation by chained equation (MICE), and 91.0, 82.6, and 68.7% using linear mixed model for Daily feed intake.
38	Jun, K	2018	Estimating pig weights from images without constraint on posture and illumination	10.1016/j.compag.2018.08.006	To propose an image based pig weight estimation method different from the previous works in three ways: 1) no constraint on pig posture and image capture environment, reducing the stress of the pigs; 2) the features obtained from 2D images are used without depending on 3D depth information; 3) the estimation model is constructed by exploiting the recent advances in machine learning	Camera	Microsoft Kinect camera (depht data were ignored)	Physical condition	Body-weight	Fattener	513	Individual		Internal				R2 = 0.79. Average estimation error: 3.15 kg
39	Kashiha, M.	2014	Automatic weight estimation of individual pigs using image analysis	10.1016/j.compag.2014.06.003	To investigate the feasibility of an automated method to estimate weight of individual pigs by using image processing.	Camera	Panasonic WV-BP330	Physical condition	Body-weight	Fattener	40	Individual		Internal	97.5% at group level (error of 0.82 kg) and 96.2% individually (error of 1.23 kg).
40	Kashiha, M.	2014	Automatic monitoring of pig locomotion using image analysis	10.1016/j.livsci.2013.11.007	To investigate the feasibility and validity of an automated image processing method to detect the locomotion of pigs in a group housed environment and under experimental conditions.	Camera	eYenamic Fancom	Activity	Motion detection (activity or inactivity periods)	Weaners	40	Group		Internal	89,8%.
41	Kashiha, M.	2013	The automatic monitoring of pigs water use by cameras	10.1016/j.compag.2012.09.015	To explore a cheap way to monitor continuous water use in a group of pigs in a farm pen, by means of image-analysis	Camera	WV-BP330 CCD	Feeding and drinking	Number of visits to the drinker	Weaners	40	Group	A system (algorithm)	Internal	0.92
42	Kim, J.	2017	Depth-based detection of standing-pigs in moving noise environments	10.3390/s17122757	To detect standing-pigs with “moving noises”, which appear every night in a commercial pig farm, but have not been reported yet.	Camera	Kinect camera (Version 2, Microsoft, USA)	Activity	Postural state, postural transitions	Weaners	13	Group	A system (algorithm)	Internal	0.9447
43	Lao, F.	2016	Automatic recognition of lactating sow behaviors through depth image processing	10.1016/j.compag.2016.04.026	To show a computer vision-based system developed that automatically recognizes sow behaviors (lying, sitting, standing, kneeling, feeding, drinking, and shifting) in farrowing crate	Camera	Microsoft Kinect	Activity	Motion detection as walking, feeding, resting / Postural state, postural transitions	Sows	3	Individual	A system (algorithm)	Internal	99.9% (lying), 96.4% (sitting), 99.2% (standing), 78.1% (kneeling), 97.4% (feeding), 92.7 (drinking), 63.9% (transitioning)
44	Larsen, M.L.V.	2019	Prediction of tail biting events in finisher pigs from automatically recorded sensor data	10.3390 / ani9070458	To develop a prediction algorithm for tail biting using sensor data on water usage (water flow and activation frequency) and pen temperature (above solid and slatted floor)	Flow meter / environmental temperature sensor	A) RS PRO RadialturbineFlowmåler; B) SKOV A/S air temperature sensor	Feeding and drinking	Water intake / Number of visits to the drinker	Fattener	1624	Group	A system (algorithm)	Internal	AUC > 0,75
45	Lee, J.	2016	Automatic recognition of aggressive behavior in pigs using a kinect depth sensor	10.3390/s16050631	To show a non-invasive, inexpensive, automatic monitoring prototype system that uses a Kinect depth sensor to recognize aggressive behavior in a commercial pig pen.	Camera	Kinect camera (Version 2, Microsoft, USA)	Behavior	Agressive behavior	Fattener	22	Group	A system (algorithm)	Internal	95,7% detection, 97,2% classification of agressive behaviours
46	Leonard, S.M. M.	2019	Development and application of an image acquisition system for characterizing sow behaviors in farrowing stalls	10.1016/j.compag.2019.104866	To: (1) implement a digital and time-of-flight depth imaging system, (2) develop a process with minimal user input to analyze the collected images, and (3) calculate the hourly and daily posture and behavior budgets of sows housed in individual farrowing stalls	Camera	Kinect V2 sensor (Microsoft, Redmond, WA)	Activity	Motion detection as walking, feeding, resting / Postural state, postural transitions	Sows	N.S.	Group		Internal	>99% sow postures, >95% behaviors	> 77.4% non-lying behavior label	> 88.3% non-lying behavior label	Postures: sitting, standing, kneeling, lying. Behaviours: feeding, drinking, others
47	Li, Y.	2020	Utilization of optical flow algorithms to monitor development of tail biting outbreaks in pigs	10.3390/ani10020323	To evaluate activity changes in pigs associated with the development of tail-biting outbreaks using optical flow algorithms	Camera	infrared digital camera (TruVision High Definition TVI Bullet Camera TVB-4403, Interlogix, Costa Mesa, CA, USA) mounted	Activity	Motion detection (activity or inactivity periods)	Fattener	120	Group		Internal
48	Liu, L.	2018	Design and test of a low-power acceleration sensor with Bluetooth Low Energy on ear tags for sow behaviour monitoring	10.1016/j.biosystemseng.2018.10.011	To show the development of an ear-attached acceleration sensor of low power consumption for sow welfare studies	Accelerometer	three-axis accelerometer (MMA 8451, NXP Semi- conductors, Eindhoven, The Netherlands); BLE module (CC2541-F256, Texas Instruments, Dallas, Texas, USA)	Activity	Motion detection as walking, feeding, resting	Sows	8	Individual	A sensor	Internal				Average mean number of broadcasts per day in power saving mode: 8.7% of the continuous mode, and 52.2% of that in the data grouping mode for the six sows. Average mean-current consumption working in the energy saving mode: saves 90% of the energy compared with the continuous mode. Average consumptions of the sensors fitted on six different sows varied within ±27.94%.
49	Loughmiller, J.A.	2001	Relationship between mean body surface temperature measured by use of infrared thermography and ambient temperature in clinically normal pigs and pigs inoculated with Actinobacillus pleuropneumoniae	10.2460/ajvr.2001.62.676	To determine the relationship between ambient temperature and mean body surface temperature (MBST) measured by use of infrared thermography (IRT) and to evaluate the ability of IRT to detect febrile responses in pigs following inoculation with Actinobacillus pleuropneumoniae	Thermal camera	Flir cPM-280 Thermacam	Physical condition	Body temperature as a physiological response (fever)	Fattener	28	Individual		Internal				r2=0.97. Significant linear relationship was observed between ambient temperature and mean body surface temperature
50	Lu, M.	2018	An automatic ear base temperature extraction method for top view piglet thermal image	10.1016/j.compag.2018.10.030	To develop and test an algorithm to extract ear base temperature automatically from top view piglet thermal images	Thermal camera	Fluke SmartView 3.14 (FLUKE Systems)	Physical condition	Body temperature	Piglets	20	Individual		Internal				For left and right ear base respectively, 97% and 98% of the testing images had an error within 0.4 °C.
51	Madsen, T.	2005	A model for monitoring the condition of young pigs by their drinking behaviour	10.1016/j.compag.2005.02.014	To test a model for uniform water or feed consumption pattern, for assessment of changes in pig health and well-being.	Flow meter	N.S.	Feeding and drinking	Water intake / Number of visits to the drinker	Weaners, fatteners	300-900	Group	A system (algorithm)	Internal		1% probability for false alarms and 1% probability for failing to detect a shift.
52	Mainau, E	2009	Validation of an automatic system to detect position changes in puerperal sows	10.1016/j.applanim.2009.09.005	To develop and validate an automatic system to register position changes between standing and lying position in farrowing sows	Photoelectric sensor	SLS (Standing Lying Sensor)Kit Cebek RJ11, Ariston Electro´nica SA, Sant Joan Despı´, Spain	Activity	Lying posture	Sows	40	Individual	A sensor	External		64.13%	87.97%
53	Marcon, M.	2017	Accelerometer technology to perform precision feeding of pregnant sows and follow their health status		To record pregnant sows' activity levels based on ear tag accelerometers, and use these data to improve the feeding practices.	accelerometer	accelerometer data logger (RF-Track, Rennes). Cameras: (cameras: National Electronics and a video tape recorder: Geutebrück	Activity	Postural state, postural transitions	Sows	96	Individual	A sensor	Internal		In slatted floor study: Lying 94,4%, standing 66,9%, moving 68,4%. In concrete floor with straw study: Lying 93,65%, standing 68,35%, moving 38,83%.
54	Martínez-Avilés, M.	2017	Early Detection of Infection in Pigs through an Online Monitoring System	10.1111/tbed.12372	To test a smart system based on accelerometers and biosensors embeded in an eartag, and video-cameras monitoring, on 10 pigs experimentally infected with two doses of an attenuated strain of African swine fever.	Accelerometer	N.S.	Activity	Motion detection (activity or inactivity periods)	Fattener	10	Individual	A system (algorithm)	Internal		0.9687	0.8854
55	Maselyne, J	2014	Validation of a high frequency radio frequency identification (HF RFID) system for registering feeding patterns of growing-finishing pigs	10.1016/j.compag.2013.12.015	To validate a High Frequency Radio Frequency Identification (HF RFID) system for its suitability to register individual pigs' feeding patterns at a round trough in a group-housing context	Load cells (Feeder / RFID)	Tags: IN Tag 300 I-Code SLI (ISO 15693, HID Global Corporation, California, EE. UU.); HF readers: ID ISC.LR2500-A, FEIG ELECTRONIC GmbH, Weilburg, Germany; multiplexors: ID ISC.ANT.MUX-A, FEIG ELECTRONIC GmbH, Weilburg , Germany. Video analysis: The Observer 5.0 Noldus Information Technology, Wageningen, The Netherlands	Feeding and drinking	Feeding time / Number of visits to the feeder	Fattener	20	Individual		External		88,58% can be reached with two tags	always > 85%. 98,34% can be reached with two tags
56	Maselyne, J	2018	Online warning systems for individual fattening pigs based on their feeding pattern	10.1016/j.biosystemseng.2017.08.006	To develop and validate an automated monitoring and warning system based on feeding patterns. The following types of warning systems were developed: (1) fixed limits that treat all pigs and all days equally; and (2) time-varying individual limits using the concept of Synergistic Control.	Load cells (Feeder / RFID)	Feeders: MIDI Swing (Big Dutchman Pig Equipment GmbH, Vechta, Germany); Tags: IN Tag 300 I-Code SLI (ISO 15693, HID Global Corporation, California, EE. UU.); HF readers: ID ISC.LR2500-A, FEIG ELECTRONIC GmbH, Weilburg, Germany; multiplexors: ID ISC.ANT.MUX-A, FEIG ELECTRONIC GmbH, Weilburg , Germany	Feeding and drinking	Feeding time / Number of visits to the feeder	Fattener	152	Individual	A system (algorithm)	Internal	accuracy 96.7%; precision 71.1% in Synergistic Control method:	58.0% in Synergistic Control method	98.7% in Synergistic Control method
57	Maselyne, J	2016	Methods to construct feeding visits from RFID registrations of growing-finishing pigs at the feed trough	10.1016/j.compag.2016.08.010	To use a high frequency (HF) Radio Frequency Identification (RFID) system to register pigs’ feeding patterns at a commercial-type feed trough.	Load cells (Feeder / RFID)	HF RFID tags (IN Tag 300 I-Code SLI tags, ISO 15693, HID Global Corporation, Irvine, CA, USA) clipped	Feeding and drinking	Number of visits to the feeder	Pigs in general	26	Individual	A sensor	Internal	97% with the bout criterion equal to 10 s for two RFID tags per pig; 98% with 20 s for one RFID tag per pig	83% with the bout criterion equal to 10 s for two RFID tags per pig; 80% with 20 s for one RFID tag per pig	98% with the bout criterion equal to 10 s for two RFID tags per pig; 99% with 20 s for one RFID tag per pig	precision: 75% with the bout criterion equal to 10 s for two RFID tags per pig, 78% with 20 s for one RFID tag per pig
58	Maselyne, J.	2016	Measuring the drinking behaviour of individual pigs housed in group using radio frequency identification (RFID)	10.1017/S1751731115000774	To design a high frequency radio frequency identification (HF RFID) system to register the drinking behaviour of individual pigs	Load cells (Drinker / RFID)	HF RFID antenna (DTE Automation GmbH, Enger, Germany); multiplexer (ID ISC.ANT.MUX-A; Feig Electronic GmbH); HF RFID tags (IN Tag 300 I-Code SLI; HID Global Corporation, Austin, TX, USA)	Feeding and drinking	Water intake / Number of visits to the drinker	Fattener	55	Individual		Internal	0.93	0.92	0.93	Precision: 90%
59	Matthews, S	2017	Automated tracking to measure behavioural changes in pigs for health and welfare monitoring	10.1038/s41598-017-17451-6	To develop and test an automated monitoring system that tracks pig movement with depth video cameras, and automatically measures standing, feeding, drinking, and locomotor activities from 3D trajectories.	Camera	Depht cameras Microsoft Kinect Xbox On	Activity	Motion detection as walking, feeding, resting	Fattener	76	Group		Internal
60	McNeil, B.	2018	Determining the time required to detect induced sow lameness using an embedded microcomputer-based force plate system	10.3844/ajavsp.2018.59.65	To determine the minimum time required to record data from each individual load cell in the force plate system to obtain accurate sow weight distributions on each leg	Load cells (Force plate)	N.S.	Health	Weight distribution on legs	Sows	12	Individual	A system (algorithm)	Internal				1 min was the minimum time required to record legs weight distribution, under experimental conditions
61	Menzel, A	2014	Actinobacillus pleuropneumoniae challenge in swine: Diagnostic of lung alterations by infrared thermography	10.1186/s12917-014-0199-2	To examine the applicability of passive infrared thermography for the diagnostic of lung tissue alterations in pigs at different stages of Actinobacillus pleuropneumoniae infection	Thermal camera	VarioCAM hr Inspec, Infratec, Dresden, Germany	Physical condition	Body temperature as a physiological response (fever)	Weaners	60	Individual	A sensor	Internal		66% (right body side) - 32% (left body side)	1
62	Mohling, C.M. M.	2014	Kinematics as objective tools to evaluate lameness phases in multiparous sows	10.1016/j.livsci.2014.04.031	To evaluate the embedded force plate and the GAITFour gait analysis walkway system as objective assessment tools to discriminate between sound and lame phases in multiparous sows	Load cells (Force plate)	A) GaitFour; B) Force plate: N.S.	Health	Weight distribution on legs / Gait characteristics	Sows	24	Individual		Internal				p < 0.05
63	Moi, M.	2014	Vocalization data mining for estimating swine stress conditions	10.1590/S0100-69162014000300008	To identify differences in swine vocalization pattern according to animal gender and different stress conditions, using the decision tree algorithm C4.5, known as J48, considering cross-validation	Microphone	unidirectional microphone Marantz® PMD 660, Praat® 5.1.19 software, WEKA® (3.5) sound analysis software, with J48 algorithm,	Behavior	Stress vocalizations	Fattener	300	Group	A system (algorithm)	Internal	0.7766
64	Moura, D.J.	2008	Real time computer stress monitoring of piglets using vocalization analysis	10.1016/j.compag.2008.05.008	To develop and test a software to monitor and analyze distinct sounds emitted by piglets correlating the noise response with levels of stress for assessing welfare.	Microphone	microphone and an AMD 1200 256 K RAM processor	Behavior	Stress vocalizations	Weaners	N.S.	Individual	A system (algorithm)	Internal				63,46 -80,04% confidence interval
65	Nasirahmadi, A	2017	Using automated image analysis in pig behavioural research: Assessment of the influence of enrichment substrate provision on lying behaviour	10.1016/j.applanim.2017.06.015	To apply an image processing technique to identify whether any changes in pig lying behaviour which might be detrimental to welfare resulted from an enrichment provision treatment	Camera	Sony RF2938, EXview HAD CCD	Activity	Lying posture	Fattener	102 - 120	Group		Internal	93-95%
66	Nasirahmadi, A.	2017	A new approach for categorizing pig lying behaviour based on a Delaunay triangulation method	10.1017/S1751731116001208	To develop a combination of image processing, MLP (multi-layer preceptron) and mathematical modelling technique for quantifying pigs' group lying behaviour responding to thermal conditions of the pen	Camera	cameras: Sony RF2938	Activity	Lying posture / animals' space distribution responding to environmental-temperature (while lying)	Fattener	88	Group		Internal	93,3-95,2% (depending on the thermal category)	89,1-94,2% (depending on the thermal category)	94,4-95,4% (depending on the thermal category)
67	Nasirahmadi, A.	2016	Automatic detection of mounting behaviours among pigs using image analysis	10.1016/j.compag.2016.04.022	To develop a method for automatic detection of mounting events amongst pigs under commercial farm conditions by means of image processing	Camera	CCVT camera (Sony RF2938, EXview HAD CCD, Board lens 3.6 mm, 90, Gyeonggi-do, South Korea)	Behavior	Mounting behaviour	Fattener	N.S.	Group		Internal	92.7%	94.5%	88.6%
68	Nasirahmadi, A.	2015	Using machine vision for investigation of changes in pig group lying patterns	10.1016/j.compag.2015.10.023	To investigate the feasibility of using image processing and the Delaunay triangulation method to detect change in group lying behaviour of pigs under commercial farm conditions and relate this to changing environmental temperature	Camera	Sony RF2938, EXview HAD CCD camera	Activity	Lying posture / animals' space distribution responding to environmental-temperature (while lying)	Fattener	44	Group	A system (algorithm)	Internal	0.958
69	Navarro, J	2009	An automatic colour-based computer vision algorithm for tracking the position of piglets	10.5424/sjar/2009073-438	To develop and test a digital image processing system based on the search and recognition of colour spots in images, which permits the detection of the position of piglets in a farrowing pen	Camera	N.S.	Identification and positioning	Positioning	Piglets	N.S.	Group		Internal				72.5% in piglet detection, 89.1% of this total being correctly detected
70	Ni, J	2017	Evaluation and characterisation of Passive Infrared Detectors to monitor pig activities in an environmental research building	10.1016/j.biosystemseng.2017.03.014	To study the potential of low-cost Passive Infrared Detector (PID) motion sensors to monitor pig activities in a swine environmental research building	Photoelectric sensor	PID sensor (Model SRN- 2000 Detector, Visonic Inc., Bloomfield, CT, USA)	Activity	Motion detection (activity or inactivity periods)	Weaners, fatteners	60	Group	A system (algorithm)	Internal				P < 0.05 detection of pig activity changes in all 5 rooms. <1s of sensor answer time.
71	Nilsson, M.	2015	Development of automatic surveillance of animal behaviour and welfare using image analysis and machine learned segmentation technique	10.1017/S1751731115001342	To explore the feasibility to extract the proportion of pigs located in different areas of a pig pen by advanced image analysis technique, and discuss its possible applications	Camera	Axis M3006	Identification and positioning	Positioning	Fattener	9	Group		Internal	0.732
72	Oczak, M	2016	Can an automated labelling method based on accelerometer data replace a human labeller? - Postural profile of farrowing sows	10.1016/j.compag.2016.06.013	To develop a method for the automated classification of sow's postures based on accelerometer data, and to evaluate if the technique can be used in a reliable way instead of human labelling to automatically create postural profiles of sows	Accelerometer	SMARTBOW® ear tag accelerometer	Activity	Postural state, postural transitions	Sows	18	Individual	A system (algorithm)	Internal	70% in cross-validation and 73% on the training set
73	Oczak, M	2014	Classification of aggressive behaviour in pigs by activity index and multilayer feed forward neural network	10.1016/j.biosystemseng.2014.01.005	To test a method to automatically detect aggressive behaviour in pigs, by using an activity index and a multilayer feed forward neural network	Camera	Allied Vision Technologies_x0002_,model F080C	Behavior	Agressive behavior	Weaners	11	Group	A system (algorithm)	Internal	99.8% high aggression events classification; 99.2% medium aggression events classification:	96.1% high aggression events classification; 86.8% medium aggression events classification:	94.2%high aggression events classification; 94.5% medium aggression events classification
74	Oczak, M	2015	Classification of nest-building behaviour in non-crated farrowing sows on the basis of accelerometer data	10.1016/j.biosystemseng.2015.09.007	To test the effectiveness of classification, on the basis of accelerometer data, of nest-building behaviour in farrowing sows that are not confined in crates	Accelerometer	Accelerometers: SMARTBOW® System (MKW Electronics GmbH, Weibern, Austria)	Behavior	Nest-building behavior	Sows	9	Individual	A system (algorithm)	Internal	0.86	0.87	0.85
75	Oczak, M.	2016	Automatic estimation of number of piglets in a pen during farrowing, using image analysis	10.1016/j.biosystemseng.2016.08.018	To develop a camera based monitoring system of the farrowing process in sows. The system, when used in practical farm conditions, should support the farm staff in reducing the problems of mortality in piglets due to perinatal asphyxia and crushing	Camera	IP camera (GV-BX 1300-KV, Geovision, Taipei, Taiwan) in protective housing (HEB32K1, Videotec, Italy), 3 m above the floor, connected to Geovision	Identification and positioning	Positioning	Sows, piglets	8	Individual		Internal	0.81			1.72 Standard error of piglets number
76	Ott, S.	2014	Automated video analysis of pig activity at pen level highly correlates to human observations of behavioural activities	10.1016/j.livsci.2013.12.011	To correlate automated activity measures through video analysis to ethological scores of pig activity, using off-line video recordings of four pens with grower pigs.	Camera	digital cameras (Panasonic 1/3″ CCD Digital Signal Processing B/W WV-BP330, Noldus, Wageningen, The Netherlands)	Activity / Behavior	Motion detection as walking, feeding, resting / Postural state, postural transitions / Agressive behavior / Affiliative behavior (playing)	Fattener	40	Group		Internal				rs= 0.92
77	Parsons, D. J.	2007	Real-time Control of Pig Growth through an Integrated Management System	10.1016/j.biosystemseng.2006.10.013	To describe the development and testing of the first prototype closed-loop, model-based, real-time system for the integrated control of pig growth and pollutant emissions	Camera	N.S.	Physical condition	Body-weight / Body sizes	Fattener	288	Individual	A system (algorithm)	Internal				root-mean-squared error of prediction (RMSEP) of the model compared with manual weights: 2,2 - 2,3 KG
78	Petry, A.	2017	Technical note: Assessment of an alternative technique for measuring body temperature in pigs	10.2527/jas2017.1566	To evaluate the efficacy of using IR as an alternative for monitoring CBT in pigs.	Thermal camera	FLIR E40	Physical condition	Body temperature	Gilts	23	Individual		Internal				r ≥ 0.96 and P <0.01 Correlation between IR eye temperature, core body temperature, rectal temperature. (R² ≥ 0.96)
79	Pluym, L	2013	Development of a system for automatic measurements of force and visual stance variables for objective lameness detection in sows: SowSIS	10.1016/j.biosystemseng.2013.06.009	To develop and test in a practical environment, a lameness detection system based on force stance variables derived from force plate analysis and visual stance variables derived from image processing: SowSIS (sow stance information system)	Load cells (Force plate)	SowSIS	Health	Weight distribution on legs	Sows	20	Individual		Internal				CV= <10% - ≤20% (low to moderate) for all stance variables, except for number and duration of both kicks and weight shifts (>20%).CV= 7% claw angle, 13% axis of the long pastern bone, 3% angle of the hock. CV= 0,26% - 0,29% for long measurements (30 min). CV= 0,19% - 4,47% when reference weights were placed on different positions on the top plate
80	Porto, S.M.C.	2012	Validation of an active RFID-based system to detect pigs housed in pens		To describe a configuration of an active RFID system alternative to that making use of position markers for the automatic detection of tags.	RFID	N.S.	Identification and positioning	Individual recognition	Fattener	4	Individual	A system (algorithm)	Internal	91,5% Quality detection percentage for indoor area; 89,3% Quality percentage for indoor area
81	Reiners, K	2009	Application of RFID technology using passive HF transponders for the individual identification of weaned piglets at the feed trough	10.1016/j.compag.2009.05.010	To examine simultaneous individual animal identification of newly weaned piglets based on radio frequency identification (RFID) using passive high frequency (HF) transponders focusing on identification rate and identification accuracy.	RFID	RFID tags: (IN Tag 300l-Code SLi, Sokymat, Granges, Switzerland; RFID reader: LR 200, Feig Electronics, Weilburg, Germany; sensor-controlled mash feeder PreMixer, EFS - System GbR, Essen i. Oldb., Germany	Identification and positioning	Individual recognition	Weaners	40	Individual		Internal	64% (delay in identification accuracy compared to video observations)			97.3% Identification rate in simultaneous individual animal. observation of focal animals
82	Ringgenberg, N	2010	Validation of accelerometers to automatically record sow postures and stepping behaviour	10.1016/j.applanim.2010.09.018	To develop and validate an automated method of detecting postures and stepping behaviour in sows	Accelerometer	HOBO accelerometer (Onset Computer Corporation, Pocasset, MA, USA)	Activity	Postural state, postural transitions	Sows	23	Individual	A system (algorithm)	Internal		for standing: 100 ± 0.01%, lying ventrally: 94 ± 0.04%, lying laterally: 91 ± 0.2%, sitting: 50 ± 0.4%	>90%
83	Rodriguez-Baena, D.	2020	Identifying livestock behavior patterns based on accelerometer dataset	10.1016/j.jocs.2020.101076	To propose a new method for automatically detecting activity and inactivity time periods of animals, as a behavior indicator of livestock.	Accelerometer	HOBO®Pendant G DataLogger (UA-004-64)	Activity	Motion detection (activity or inactivity periods)	Fattener	20	Individual	A system (algorithm)	Internal	0,74 - 0,81	0,59 - 0,86	0,56 - 0,7
84	Scheel, C.	2017	Detecting lameness in sows from ear tag-sampled acceleration data using wavelets	10.1017 / S1751731117000726	To develop an automated monitoring system to detect lameness in group-housed sows early and reliably on the basis of acceleration data sampled from ear tags	Accelerometer	MKW Electronics	Activity	Motion detection (activity or inactivity periods) / Walking (number of steps)	Sows	14	Individual	A system (algorithm)	Internal	0,93; 0,79; 0,57 for last 3 days, respectively
85	Schinckel, A.P.	2005	Evaluation of a Method to Analyze Pig Live Weight Data from Animal Sorting Technologies	10.15232/S1080-7446(15)31166-9	To develop and evaluate an alternative method of analyzing the body weight data collected by an animal sorting system, and to evaluate the impact of the serial marketing of pigs on the predicted body weight growth rates and predicted days to achieve a specific market body weight	Load cells (Sorting scale)	N.S.	Physical condition	Body-weight	Fattener	1000	Individual		Internal				daily residual error (mean = 0; SD = 1.4 kg) and a within-day residual error (mean = 0; SD = 0.98 kg).
86	Schinckel, A.P.	2009	Evaluation of Alternative Methods to Analyze Pig Body Weight Data from Animal Sorting Technologies	10.15232/S1080-7446(15)30774-9	To evaluate methods to analyze pig body weight data collected by an animal sorting technology scale without individual pig identification	Load cells (Sorting scale)	Sorting scale: Cristal Spring, Mmanitba, Canada	Physical condition	Body-weight	Fattener	N.S.	Group		Internal
87	Schmidt, M	2014	The suitability of infrared temperature measurements for continuous temperature monitoring in gilts	10.7482/0003-9438-57-021	To evaluate whether an infrared thermometer, a pyrometer, could detect the body surface temperature in the orbital area of gilts without contacting them.	Pyrometer	Optris CS - pyrometer, Optris	Physical condition	Body temperature	Gilts	44	Individual		External
88	Schön, P.C.	2004	Automated recording of stress vocalisations as a tool to document impaired welfare in pigs		To develop a system to monitor and record levels of stress calls in pigs, which could be employed in environments of breeding, transportation and slaughter	Microphone	STREMODO, Big Dutchman GmbH, Vechta, Germany (Stress Monitor and Documentation unit): Sennheiser MKE 46 microphone and Sony DCT-790 DAT-Recorder	Behavior	Stress vocalizations	Fattener	63 (~ 28 in training set (piglets: n= 13; weaners: n= 10; sows: n= 5; fatterners: n= N.A.); 35 fatteners in external test set)	Group	A system (algorithm)	External				rs= 0,84 (IN PRACTICAL EXTERNAL SET) correlation between STREMODO and human experts. <5% recognition errors in detection of stress vocalisations of pigs in noisy pig units and <1% misclassifications of stress calls (IN TRAINING SET);
89	Shao, B.	2008	A real-time computer vision assessment and control of thermal comfort for group-housed pigs	10.1016/j.compag.2007.09.006	To describe a real-time image processing system to detect movement and classify thermal comfort state of group-housed pigs based on their resting behavioral patterns.	Camera	N.S.	Physical condition	Animals’ space distribution associated to body-temperature or group radiated-temperature	Fattener	7	Individual, group		Internal	>90%
90	Silva, M.	2008	Cough localization for the detection of respiratory diseases in pig houses	10.1016/j.compag.2008.05.024	To propose an algorithm for localizing cough sounds by using the difference in arrival time of a sound signal between different microphones: description of a sound source localization algorithm, (ii) assessment of the accuracy of this algorithm and (iii) apply the localization algorithm on cough sounds in field situation.	Microphone	Microphones Monacor ECM 3005; TDIF interface unit (Soundscape SS8IO-3)	Health	Cough detection	Fattener	350	Group	A system (algorithm)	Internal				95% confidence. Mean error between 1.5 and 0m. Maximum standard deviation on the error of 0.4 m.
91	Statham, P.	2020	Quantifying defence cascade responses as indicators of pig affect and welfare using computer vision methods	10.1038/s41598-020-65954-6	To evaluate whether defense cascade response (startle, freeze) can be quantified in pigs using computer vision	Camera	Fast capture video cameras (3 monochrome Point Grey Dragonfly Expres); Microsoft Kinect v1 camera ; infrared Qualisys cameras (ProReflex MCU240, Kinematic Infrared camera: Qualisys AB, Goteborg, Sweden; load platform: N.A.	Behavior	Cascade defense (freezing and startle duration)	Fattener	12	Individual		Internal				rs= 0.92, 0,85, 0.89, 0,87, 0,88 between observer and KLT Speed, KLT Acceleration, Kinect Speed, Kinect Acceleration, Load Platform respectively. (freeze duration). rs= 0,82, 0.82, 0.82, 0.77, 0.7 between observer and Load Platform, Kinematic Velocity, Kinematic Acceleration, Kinect Speed, Kinect Acceleration, respectively. (startle duration).
92	Stavrakakis, S.	2015	Validity of the Microsoft Kinect sensor for assessment of normal walking patterns in pigs	10.1016/j.compag.2015.07.003	To test the potential of a kinematic sensor combined with IR cameras' images to detect lameness, using gait abnormality analysis based on the movement of the axial body during walking.	Camera	Microsoft Kinect V1	Health	Axial body movements trajectory during walking	Fattener	7	Individual		Internal				r=0.994
93	Sun, G	2011	Development of an embedded microcomputer-based force plate system for measuring sow weight distribution and detection of lameness	10.13031 / 2013.37063	To develop an embedded microcomputer-based force plate system to measure vertical forcesproduced by each limb of the sow and evaluate data accuracy to the sow's known weight	Load cells (Force plate)	N.S.	Health	Weight distribution on legs	Sows	8	Individual		Internal				CV= 5,22% between force plate and a scale as a gold standard
94	Šustr, P.	2001	Computer-aided method for calculating animal configurations during social interactions from two-dimensional coordinates of color-marked body parts	10.3758/BF03195390	To study the mutual spatial positions of pigs during paired social interactions, using a FoxPro program designed to clean the raw data	Camera	cameras: N.A.; Ethovision software	Behavior	Agressive behavior	Weaners	96	Individual	A system (algorithm)	Internal	0.7
95	Sykes, D.J. J.	2012	The use of digital infrared thermal imaging to detect estrus in gilts	10.1016/j.theriogenology.2012.01.030	To use digital infrared thermal imaging (DITI) to discriminate between estrus and diestrus phases of the porcine estrous cycle	Thermal camera	FLIR ThermoCAM S60; GLA M500 digital thermometer (GLA Ag- riculture Electronics, San Luis Obispo, CA, USA)	Physical condition	Body temperature	Gilts	32	Individual		External				R= -0.37 and P= 0.03P (rectal and ambient temperatures). P <0.01 (vulvar and ambient temperatures). P <0,05 (vulvar and rectal temperatures).
96	Thompson, R.J	2016	Porcine lie detectors: Automatic quantification of posture state and transitions in sows using inertial sensors	10.1016/j.compag.2016.07.017	To present an approach to automated classification and quantification of sow postures and posture transitions that may enable large scale and accurate continuous behaviour assessment on farm	Accelerometer	N.S.	Activity	Postural state, postural transitions	Sows	6	Individual	A system (algorithm)	Internal	All postures (except sitting): 0,74; sitting posture: 0,54; postures transition: 0,826	Postures transition: 0,761
97	Thompson, R.J	2019	Freedom to lie: How farrowing environment affects sow lying behaviour assessment using inertial sensors	10.1016/j.compag.2019.01.035	To address the use of accelerometery to automatically monitor lying behaviour in free-farrowing sows, and validate the model	Accelerometer	Axivity AX3	Activity / Behavior	Postural state, postural transitions / Nest-building behavior	Sows	8	Individual	A system (algorithm)	Internal
98	Traulsen, I.	2016	Automatic detection of lameness in gestating group-housed sows using positioning and acceleration measurements	10.1017/S175173111500302X	To evaluate data of a positioning system including acceleration measurements to detect lameness in group-housed sows	Accelerometer	Ear sensors: MKW Elec-tronics GmbH, Weibern, Austria	Activity / Identification and positioning	Motion detection (activity or inactivity periods) / Walking (number of steps) / Positioning	Sows	212	Individual	A sensor	Internal
99	Van Hirtum, A.	2004	Objective recognition of cough sound as biomarker for aerial pollutants	10.1046/j.1600-0668.2003.00195.x	To test the performance of a previously developed algorithm for cough classification, for using sound analysis as an objective contactless non-invasive biomarker for aerial pollution is studied on free-field cough sounds	Microphone	N.S.	Health	Cough detection	Weaners	12	Group	A system (algorithm)	Internal	> 90% and maintained 94% on average recognition performance for all aerial pollutants (irritating gas (ammonia): 98%, respirable particles (dust): 95%, and temperature: 90%)
100	Van Riet, M	2019	On-Farm claw scoring in sows using a novel mobile device	10.3390/s19061473	To develop and test a claw lesions and lameness scoring device for collecting data in practical conditions in reproductive phases.	Camera	N.S.	Health	Claw lessions detection	Sows	20	Individual		Internal
101	Vandermeulen, J.	2015	Discerning pig screams in production environments	10.1371/journal.pone.0123111	To develop a method to detect screams based on sound features with physical meaning and explicit rules, to understand which sound features define a scream. Stressful situations were applied (feed deprivation)	Microphone	Microphone (C-4 Small Diaphragm Condenser Mic, Behringer, Germany); audio program Adobe Audition (Adobe Systems, San José, US)	Behavior	Stress vocalizations	Fattener	24	Group	A system (algorithm)	Internal	0.83	0.72	0.91
102	Viazzi, S.	2014	Image feature extraction for classification of aggressive interactions among pigs	10.1016/j.compag.2014.03.010	To develop a method for continuous automated detection of aggressive behaviour among pigs by means of image processing	Camera	Guppy F-080C and Guppy GC1350 camera	Behavior	Agressive behavior	Weaners	120	Group		Internal	0.89	0.893	0.887
103	Von Jasmund, N.	2020	Using passive infrared detectors to record group activity and activity in certain focus areas in fattening pigs	10.3390/ani10050792	To use infrared thermal changes detection to measure the activity of a group of fattening pigs in the pen and in the five functional areas for resting, feeding, drinking, exploration, and elimination, and contrast it with activity video recording and climatic conditions (NH3 concentrations)	Photoelectric sensor	PID: 1362922, Conrad Electronics SE, Hirschau, Germany; NH3 sensor: Polytron ® C300 and Electrochemical Gas Sensor, Dräger, Lübeck, Germany	Activity	Motion detection (activity or inactivity periods)	Fattener	11	Group		Internal				r = 0.87 (p < 0.01)
104	Wang, K	2018	A portable and automatic Xtion-based measurement system for pig body size	10.1016/j.compag.2018.03.018	To develop a novel portable and automatic measurement system for pig body size, based on depth cameras	Camera	N.S.	Physical condition	Body weight / Body sizes	Fattener	20	Individual		Internal				10.30% Average relative errors for body width measurement, 5.87% for hip width measurement, and 7.01% for body height measurement.
105	White, R.P. P.	2004	The effectiveness of a visual image analysis (VIA) system for monitoring the performance of growing/finishing pigs	10.1017 / s1357729800058811	To measure the performance of finishing pigs by means of VIAS, and contrast it with a platform weigher	Camera	Camera: N.A. ; feeding station with integrated platform balance (FIRE ® Feeder, Osborne Europe Ltd, Newcastle upon Tyne, UK)	Physical condition	Body-weight	Fattener	116	Individual		Internal				95% confidence
106	Wongsriworaphon, A.	2015	An approach based on digital image analysis to estimate the live weights of pigs in farm environments	10.1016/j.compag.2015.05.004	To propose an estimation system for the live weights of pigs that could be practically employed in a real farm environment without disturbing the animals	Camera	camera Sony DSC-HX5	Physical condition	Body-weight	Fattener	458	Individual	A system (algorithm)	Internal	91-96%
107	Yang, A	2020	An automatic recognition framework for sow daily behaviours based on motion and image analyses	10.1016/j.biosystemseng.2020.01.016	To develop a general and automatic recognition framework for recognising the daily behaviours of lactating sows to save manual labour and promote smart management.	Camera	N.S.	Activity / Behavior	Motion detection as walking, feeding, resting / Affiliative behavior (nursing)	Sows	3	Individual		Internal	97.49% for drinking, 95.36% for feeding, and 88.09% for nursing
108	Zhang, Y.	2019	Real-time sow behavior detection based on deep learning	10.1016/j.compag.2019.104884	To propose a real-Time Sow Behavior Detection Algorithm based on Deep Learning (SBDA-DL), used for real-time detection of three typical sow behaviors: drinking, urination, and mounting	Camera	(Haikang DS-2CD3355-I) infrared network camera	Activity / Behavior	Motion detection as walking, feeding, resting / Mounting behaviour	Sows	N.S.	Individual		Internal				96.5%, 91.4%, and 92.3% Average precision to detect drinking, urination, and mounting behaviors, respectively
109	Zhao, J.	2020	Dnn-hmm based acoustic model for continuous pig cough sound recognition	10.25165/j.ijabe.20201303.4530	To propose a novel method based on Deep Neural Networks-Hidden Markov Model (DNN-HMM) for constructing an acoustic model for continuous pig cough sound recognition	Microphone	recording pen (China, Mrobo M66)	Health	Cough detection	Pigs in general	10	Group	A system (algorithm)	Internal	0.92			8,03% Word Error Rate Average
110	Zheng, C	2018	Automatic recognition of lactating sow postures from depth images by deep learning detector	10.1016 / j.compag.2018.01.023	To measure lactating sows' postures quantitatively in an automatic detection system on computer vision	Camera	Microsoft Kinect v2 depth sensor	Activity	Postural state, postural transitions	Sows	N.S.	Individual		Internal				AUC= 0.991, 0.776, 0.763
111	Zhu, W.-X.	2017	Recognition and drinking behaviour analysis of individual pigs based on machine vision	10.1016/j.livsci.2017.09.003	To propose a method using machine vision to (a) recognise the presence of an individual pig within the drinking zone and (b) analyse the vision images to determine if the pig is drinking	Camera	FL3-U3-88S2C-C camera	Feeding and drinking	Drinking duration / Number of visits to the drinker	Pigs in general	7	Individual	A system (algorithm)	Internal	0.907
